# Supplementary material
Source: PubMed Central journal article supplement (PMC1317940)

**A**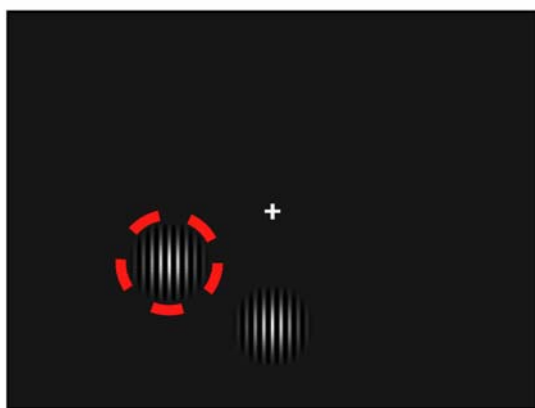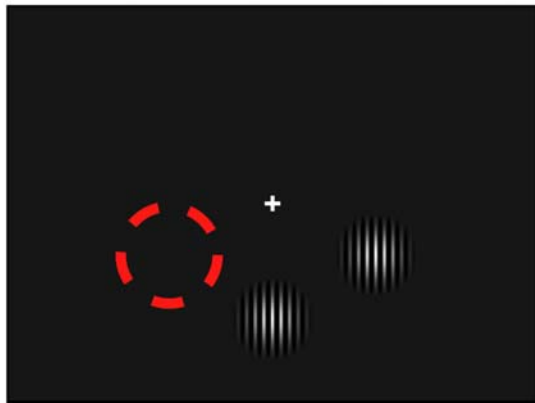**B**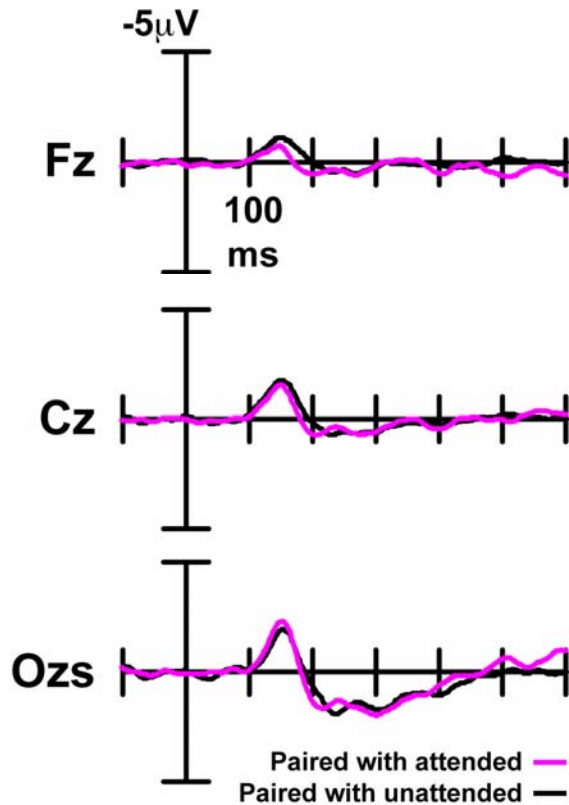

Supplement: pnas_0507704102_1.pdf [file pnas_0507704102_1.pdf]
